# Supplementary material for: The Impact of IL-6 and IL-10 Gene Polymorphisms in Diffuse Large B-Cell Lymphoma Risk and Overall Survival in an Arab Population: A Case-Control Study
Source: MDPI journal article supplement (doi:10.3390/cancers12020382), 2020-02-07
Supplement: s1 [file s1]

**Table S1.** The Hardy Weinberg equilibrium (HWE) p-values for the cases and the controls.

| <b>rs1800795</b> | <b>HWE* <i>p</i>-value</b> | <b>HWE* <i>p</i>-value</b> |
|------------------|----------------------------|----------------------------|
| Allele G         | 1                          | 0.78                       |
| Allele C         |                            |                            |
| Genotype G/G     | 1                          | 0.78                       |
| Genotype C/G     |                            |                            |
| Genotype C/C     |                            |                            |
| Genotype C/G-C/C |                            |                            |
| Genotype G/G-C/G |                            |                            |
| Genotype G/G-C/C |                            |                            |
| <b>rs1800796</b> |                            |                            |
| Allele G         | 0.15                       | 0.85                       |
| Allele C         |                            |                            |
| Genotype G/G     | 0.15                       | 0.85                       |
| Genotype G/C     |                            |                            |
| Genotype C/C     |                            |                            |
| Genotype G/C-C/C |                            |                            |
| Genotype G/G-G/C |                            |                            |
| Genotype G/G-C/C |                            |                            |
| <b>rs1800797</b> |                            |                            |
| Allele G         | 1                          | 1                          |
| Allele A         |                            |                            |
| Genotype G/G     | 1                          | 1                          |
| Genotype A/G     |                            |                            |
| Genotype A/A     |                            |                            |
| Genotype A/G-A/A |                            |                            |
| Genotype G/G-A/G |                            |                            |
| Genotype G/G-A/A |                            |                            |
| <b>rs1800871</b> |                            |                            |
| Allele G         | 0.37                       | 0.55                       |
| Allele A         |                            |                            |
| Genotype G/G     | 0.37                       | 0.55                       |
| Genotype G/A     |                            |                            |
| Genotype A/A     |                            |                            |
| Genotype G/A-A/A |                            |                            |
| Genotype G/G-G/A |                            |                            |
| Genotype G/G-A/A |                            |                            |
| <b>rs1800872</b> |                            |                            |
| Allele G         | 0.4                        | 0.08                       |
| Allele T         |                            |                            |

|                  |      |      |
|------------------|------|------|
| Genotype G/G     | 0.4  | 0.08 |
| Genotype G/T     |      |      |
| Genotype T/T     |      |      |
| Genotype G/T-T/T |      |      |
| Genotype G/G-G/T |      |      |
| Genotype G/G-T/T |      |      |
| <b>rs1800890</b> |      |      |
| Allele A         | 1    | 0.73 |
| Allele T         |      |      |
| Genotype A/A     | 1    | 0.73 |
| Genotype A/T     |      |      |
| Genotype T/T     |      |      |
| Genotype A/T-T/T |      |      |
| Genotype A/A-A/T |      |      |
| Genotype A/A-T/T |      |      |
| <b>rs1800896</b> |      |      |
| Allele T         | 0.57 | 0.69 |
| Allele C         |      |      |
| Genotype T/T     | 0.57 | 0.69 |
| Genotype C/T     |      |      |
| Genotype C/C     |      |      |
| Genotype C/T-C/C |      |      |
| Genotype T/T-C/T |      |      |
| Genotype T/T-C/C |      |      |

\*HWE: Hardy-Weinberg equilibrium.
