# Supplementary material for: The Impact of IL-6 and IL-10 Gene Polymorphisms in Diffuse Large B-Cell Lymphoma Risk and Overall Survival in an Arab Population: A Case-Control Study
Source: MDPI journal article supplement (doi:10.3390/cancers12020382), 2020-02-07
Supplement: s1 [file s1]

**Table S4:** Multivariate Survival analyses using Cox Regression Model for SNP 1800797 and controlling for Age and Stage.

| Model                        | OR^ (95% CI)       | P-value | Model p-value |
|------------------------------|--------------------|---------|---------------|
| Codominant Genotype          |                    | 0.002   | 0.000         |
| A/A vs. G/G                  | 1.85 (0.85-4.02)   | 0.122   |               |
| A/G vs. G/G                  | 24.25 (4.2-139.8)  | 0.000   |               |
| Age in Years*                |                    | 0.404   |               |
| 15-19 vs. 0-14               | 0.58 (0.08-4.28)   | 0.59    |               |
| 20-40 vs. 0-14               | 0.91 (0.40-2.0)    | 0.81    |               |
| 41-55 vs. 0-14               | 0.46 (0.21-1.0)    | 0.05    |               |
| Ann Arbor Stage at Diagnosis |                    | 0.407   |               |
| 1 vs. 0                      | 1.97 (0.23-17.16)  | 0.540   |               |
| 2 vs. 0                      | 0.66 (0.32-1.40)   | 0.280   |               |
| 3 vs. 0                      | 1.73 (0.62-4.82)   | 0.297   |               |
| 4 vs. 0                      | 0.54 (0.16-1.76)   | 0.303   |               |
| Dominant Genotype            |                    |         | 0.221         |
| A/G-A/A vs. G/G              | 1.46 (0.72-2.99)   | 0.295   |               |
| Age in Years*                |                    | 0.363   |               |
| 15-19 vs. 0-14               | 0.53 (0.07-3.95)   | 0.537   |               |
| 20-40 vs. 0-14               | 1.07 (0.48-2.35)   | 0.874   |               |
| 41-55 vs. 0-14               | 0.46 (0.21-1.02)   | 0.056   |               |
| Ann Arbor Stage at Diagnosis |                    | 0.601   |               |
| 1 vs. 0                      | 1.97 (0.23-17.16)  | 0.540   |               |
| 2 vs. 0                      | 0.66 (0.32-1.40)   | 0.280   |               |
| 3 vs. 0                      | 1.73 (0.62-4.82)   | 0.297   |               |
| 4 vs. 0                      | 0.54 (0.16-1.76)   | 0.303   |               |
| Recessive Genotype           |                    |         | 0.000         |
| G/G-A/G vs. A/A              | 14.53 (2.87-73.53) | 0.001   |               |
| Age in Years*                |                    | 0.391   |               |
| 15-19 vs. 0-14               | 0.49 (0.07-3.59)   | 0.48    |               |
| 20-40 vs. 0-14               | 0.91 (0.4-2.05)    | 0.814   |               |
| 41-55 vs. 0-14               | 0.46 (0.21-1.01)   | 0.053   |               |
| Ann Arbor Stage at Diagnosis |                    | 0.391   |               |
| 1 vs. 0                      | 1.25 (0.16-9.95)   | 0.833   |               |
| 2 vs. 0                      | 0.71 (0.34-1.49)   | 0.363   |               |
| 3 vs. 0                      | 2.02 (0.73-5.57)   | 0.173   |               |
| 4 vs. 0                      | 0.54 (0.17-1.79)   | 0.317   |               |
| Overdominant Genotype        |                    | 0.101   | 0.145         |
| G/G-A/G vs. A/A              | 0.52 (0.24-1.13)   | 0.101   |               |
| Age in Years*                |                    | 0.371   |               |
| 15-19 vs. 0-14               | 0.57 (0.08-4.25)   | 0.586   |               |

|                              |                   |       |  |
|------------------------------|-------------------|-------|--|
| 20-40 vs. 0-14               | 1.06 (0.48-2.32)  | 0.892 |  |
| 41-55 vs. 0-14               | 0.46 (0.21-1.01)  | 0.054 |  |
| Ann Arbor Stage at Diagnosis |                   | 0.585 |  |
| 1 vs. 0                      | 1.77 (0.21-15.28) | 0.604 |  |
| 2 vs. 0                      | 0.74 (0.36-1.54)  | 0.423 |  |
| 3 vs. 0                      | 1.58 (0.57-4.37)  | 0.382 |  |
| 4 vs. 0                      | 0.54 (0.16-1.78)  | 0.310 |  |
