# Supplementary material for: The Impact of IL-6 and IL-10 Gene Polymorphisms in Diffuse Large B-Cell Lymphoma Risk and Overall Survival in an Arab Population: A Case-Control Study
Source: MDPI journal article supplement (doi:10.3390/cancers12020382), 2020-02-07
Supplement: s1 [file s1]

**Table S3.** Genotype distribution of the IL-6 and IL-10 in DLBCL patients.

| SNP ID                     | Model        | Genotype | OR^ (95% CI)      | P-value |
|----------------------------|--------------|----------|-------------------|---------|
| <b>rs1800795<br/>IL-6</b>  | Codominant   | G/G      | 1                 | 0.89    |
|                            |              | C/G      | 0.91 (0.54-1.53)  |         |
|                            |              | C/C      | 1.26 (0.24-6.66)  |         |
|                            | Dominant     | G/G      | 1                 | 0.79    |
|                            |              | C/G-C/C  | 0.93 (0.56-1.54)  |         |
|                            | Recessive    | G/G-C/G  | 1                 | 0.76    |
|                            |              | C/C      | 1.30 (0.25-6.78)  |         |
|                            | Overdominant | G/G-C/C  | 1                 | 0.71    |
|                            |              | C/G      | 0.91 (0.54-1.52)  |         |
| <b>rs1800796<br/>IL-6</b>  | Codominant   | G/G      | 1                 | 0.66    |
|                            |              | G/C      | 1.02 (0.55-1.89)  |         |
|                            |              | C/C      | NA (0.00-NA)      |         |
|                            | Dominant     | G/G      | 1                 | 0.88    |
|                            |              | G/C-C/C  | 1.05 (0.57-1.94)  |         |
|                            | Recessive    | G/G-G/C  | 1                 | 0.36    |
|                            |              | C/C      | NA (0.00-NA)      |         |
|                            | Overdominant | G/G-C/C  | 1                 | 0.96    |
|                            |              | G/C      | 1.02 (0.55-1.88)  |         |
| <b>rs1800797<br/>IL-6</b>  | Codominant   | G/G      | 1                 | 0.88    |
|                            |              | A/G      | 0.90 (0.54-1.49)  |         |
|                            |              | A/A      | 1.24 (0.24-6.54)  |         |
|                            | Dominant     | G/G      | 1                 | 0.74    |
|                            |              | A/G-A/A  | 0.92 (0.56-1.50)  |         |
|                            | Recessive    | G/G-A/G  | 1                 | 0.77    |
|                            |              | A/A      | 1.28 (0.24-6.68)  |         |
|                            | Overdominant | G/G-A/A  | 1                 | 0.67    |
|                            |              | A/G      | 0.90 (0.54-1.48)  |         |
| <b>rs1800871<br/>IL-10</b> | Codominant   | G/G      | 1                 | 0.76    |
|                            |              | G/A      | 0.85 (0.53-1.37)  |         |
|                            |              | A/A      | 1.07 (0.44-2.63)  |         |
|                            | Dominant     | G/G      | 1                 | 0.58    |
|                            |              | G/A-A/A  | 0.88 (0.56-1.39)  |         |
|                            | Recessive    | G/G-G/A  | 1                 | 0.75    |
|                            |              | A/A      | 1.15 (0.48-2.75)  |         |
|                            | Overdominant | G/G-A/A  | 1                 | 0.46    |
|                            |              | G/A      | 0.84 (0.53-1.34)  |         |
| <b>rs1800872<br/>IL-10</b> | Codominant   | G/G      | 1                 | 0.76    |
|                            |              | G/T      | 0.93 (0.58-1.47)  |         |
|                            |              | T/T      | 0.97 (0.41-2.28)) |         |
|                            | Dominant     | G/G      | 1                 | 0.58    |
|                            |              | G/T-T/T  | 0.93 (0.60-1.45)  |         |
|                            | Recessive    | G/G-G/T  | 1                 | NA*     |
|                            |              | T/T      | 1.00 (0.43-2.30)  |         |
|                            | Overdominant | G/G-T/T  | 1                 | 0.76    |
|                            |              | G/T      | 0.93 (0.59-1.46)  |         |

|                            |              |                   |                                           |      |
|----------------------------|--------------|-------------------|-------------------------------------------|------|
| <b>rs1800890<br/>IL-10</b> | Codominant   | A/A<br>A/T<br>T/T | 1<br>0.85 (0.52-1.37)<br>0.78 (0.33-1.81) | 0.73 |
|                            | Dominant     | A/A<br>A/T-T/T    | 1<br>0.83 (0.53-1.32)                     | 0.44 |
|                            | Recessive    | A/A-A/T<br>T/T    | 1<br>0.84 (0.37-1.90)                     | 0.67 |
|                            | Overdominant | A/A-T/T<br>A/T    | 1<br>0.88 (0.55-1.40)                     | 0.58 |
| <b>rs1800896<br/>IL-10</b> | Codominant   | T/T<br>C/T<br>C/C | 1<br>0.89 (0.55-1.45)<br>1.18 (0.61-2.30) | 0.67 |
|                            | Dominant     | T/T<br>C/T-C/C    | 1<br>0.96 (0.60-1.51)                     | 0.85 |
|                            | Recessive    | T/T-C/T<br>C/C    | 1<br>1.26 (0.69-2.30)                     | 0.44 |
|                            | Overdominant | T/T-C/C<br>C/T    | 1<br>0.85 (0.55-1.31)                     | 0.45 |

^: Odd Ratio

\*NA: not available.
