# Supplementary material for: The Impact of IL-6 and IL-10 Gene Polymorphisms in Diffuse Large B-Cell Lymphoma Risk and Overall Survival in an Arab Population: A Case-Control Study
Source: MDPI journal article supplement (doi:10.3390/cancers12020382), 2020-02-07
Supplement: s1 [file s1]

**Table S2.** The Frequency of allele and genotype for seven cytokines related SNPs in DLBCL patients and controls (Case / Control).

| SNP ID       |            |               |         |
|--------------|------------|---------------|---------|
| rs1800795    | Cases N(%) | Controls N(%) | p-value |
| Allele G     | 200 (85) ^ | 390 (86) ^    | 0.878   |
| Allele C     | 34 (15) ^  | 64 (14) ^     |         |
| Genotype G/G | 85 (72.7)  | 168 (74)      | 0.936** |
| Genotype C/G | 30 (25.6)  | 54 (23.8)     |         |
| Genotype C/C | 2 (1.7)    | 5 (2.2)       |         |
| rs1800796    |            |               |         |
| Allele G     | 230 (93) ^ | 439 (92) ^    | 0.804   |
| Allele C     | 18 (7) ^   | 37 (8) ^      |         |
| Genotype G/G | 106 (85.5) | 202 (84.9)    | 1**     |
| Genotype G/C | 18 (14.5)  | 35 (14.7)     |         |
| Genotype C/C | 0 (0)      | 1 (0.4)       |         |
| rs1800797    |            |               |         |
| Allele G     | 204 (85) ^ | 404 (86) ^    | 0.832   |
| Allele A     | 36 (15) ^  | 68 (16) ^     |         |
| G/G          | 86 (71.7)  | 173 (73.3)    | 0.907** |
| A/G          | 32 (26.7)  | 58 (24.6)     |         |
| A/A          | 2 (1.7)    | 5 (2.1)       |         |
| rs1800871    |            |               |         |
| Allele G     | 165 (72) ^ | 313 (73) ^    | 0.761   |
| Allele A     | 63 (28) ^  | 113 (27) ^    |         |
| Genotype G/G | 59 (51.8)  | 117 (54.9)    | 0.756   |
| Genotype G/A | 47 (41.2)  | 79 (37.1)     |         |
| Genotype A/A | 8 (7)      | 17 (8)        |         |
| rs1800872    |            |               |         |
| Allele G     | 169 (72) ^ | 342 (72) ^    | 0.813   |
| Allele T     | 67(28) ^   | 130 (28) ^    |         |
| Genotype G/G | 60 (50.9)  | 124 (52.5)    | 0.952   |
| Genotype G/T | 49 (41.5)  | 94 (39.8)     |         |
| Genotype T/T | 9 (7.6)    | 18 (7.6)      |         |
| rs1800890    |            |               |         |
| Allele A     | 154 (70) ^ | 321 (73) ^    | 0.426   |
| Allele T     | 66 (30) ^  | 119 (27) ^    |         |

|                  |            |            |       |
|------------------|------------|------------|-------|
| Genotype A/A     | 54 (49.1)  | 118 (53.6) | 0.725 |
| Genotype A/T     | 46 (41.8)  | 85 (38.6)  |       |
| Genotype T/T     | 10 (9.1)   | 17 (7.7)   |       |
| <b>rs1800896</b> |            |            |       |
| Allele T         | 147 (60) ^ | 277 (59) ^ | 0.782 |
| Allele C         | 99 (40) ^  | 195 (41) ^ |       |
| Genotype T/T     | 42 (34.1)  | 83 (35.2)  | 0.670 |
| Genotype C/T     | 63 (51.2)  | 111 (47)   |       |
| Genotype C/C     | 18 (14.6)  | 42 (17.8)  |       |

^ Allele frequency and percent. The allele frequency might be counted twice in each person.

\*\* Fisher's Exact test
